# Supplementary material for: Occurrence of a novel mastrevirus in sugarcane germplasm collections in Florida, Guadeloupe and Réunion
Source: Virol J. 2017 Jul 28;14:146. doi: 10.1186/s12985-017-0810-9 (PMC5534050; doi:10.1186/s12985-017-0810-9)
Supplement: Supplementary file 3 — Rep gene amino acid sequence pairwise comparison. (XLSX 35 kb) [file 12985_2017_810_MOESM3_ESM.xlsx]

## Sheet: Mastrevirus Rep_130217.fas_mat
	KJ437671_ACSV	AM849097_CpCDV_C	AM933135_CpCDV_E	FR687960_CpCDV_D	Y11023_CpCDV_B	FR687959_CpCDV_A	JN989446_TYDV_C	M81103_TYDV_A	GU256531_CpCV_B	GU256532_CpRLV	JN989415_CpCV_A	JN989426_CpCV_E	JN989420_CpCAV	JN989416_CpCV_C	JN989439_CpYV	JQ948051_SSMV_1	JQ948052_SSMV_2	JX458740_DfasMV	KF806702_SMaV	KR15078_SCStV_A	KX352044_SCStV_D	KX352043_SCStV_B	KX352045_SCStV_C	AF007881_MSV_C	AF329889_MSV_D	EU628643_MSV_K	EU628641_MSV_J	EU628597_MSV_B	EU628626_MSV_E	EU628639_MSV_I	EU628629_MSV_F	EU628638_MSV_H	EU628631_MSV_G	Y00514_MSV_A	M23022_DSV	AF072672_SSRV_A	EU244916_SSRV_B	EU244914_SSV_B	M82918_SSV_A	KX787914_SCSV	EU244915_ESV	AF239159_SSEV	EU445697_USV	GQ273988_SacSV	EU224264_PanSV_C	GQ415397_PanSV_H	L39638_PanSV_A	GQ415389_PanSV_E	GQ415401_PanSV_I
KJ437671_ACSV	100.001
AM849097_CpCDV_C	49.501	100.001
AM933135_CpCDV_E	50.801	88.601	100.001
FR687960_CpCDV_D	50.801	90.401	92.501	100.001
Y11023_CpCDV_B	51.401	89.501	92.501	94.001	100.001
FR687959_CpCDV_A	51.101	88.301	89.801	90.101	90.101	100.001
JN989446_TYDV_C	48.801	75.601	77.101	77.101	76.501	78.001	100.001
M81103_TYDV_A	49.101	77.201	77.501	78.401	76.601	78.101	94.001	100.001
GU256531_CpCV_B	47.601	67.701	68.301	68.601	69.201	69.501	73.701	74.801	100.001
GU256532_CpRLV	48.801	69.201	68.301	67.701	68.001	67.701	69.001	70.301	71.801	100.001
JN989415_CpCV_A	48.201	70.701	70.401	70.701	71.001	71.601	72.501	73.601	77.401	80.101	100.001
JN989426_CpCV_E	48.801	69.801	70.401	69.801	69.801	70.701	72.501	73.601	77.401	79.501	96.701	100.001
JN989420_CpCAV	50.701	69.801	69.801	69.801	69.501	70.101	73.101	73.001	73.301	76.901	85.201	84.301	100.001
JN989416_CpCV_C	48.801	69.501	69.801	70.701	70.701	69.801	74.301	75.101	77.401	78.901	81.601	82.501	80.101	100.001
JN989439_CpYV	48.601	68.301	69.201	69.501	68.601	67.701	74.401	74.901	74.301	79.901	81.401	82.301	81.101	81.401	100.001
JQ948051_SSMV_1	47.601	49.201	49.801	50.201	50.201	50.001	51.801	50.601	48.801	51.801	53.301	54.501	51.601	50.901	52.001	100.001
JQ948052_SSMV_2	49.601	47.401	48.301	48.001	48.601	48.601	47.701	48.001	46.701	52.301	50.601	50.301	50.901	50.301	50.201	54.801	100.001
JX458740_DfasMV	50.601	50.501	51.401	53.401	51.101	50.301	51.101	51.101	50.201	52.001	52.901	55.001	52.301	53.201	51.801	54.301	60.801	100.001
KF806702_SMaV	47.301	49.401	50.601	50.301	50.301	50.301	48.601	48.401	48.101	49.601	47.801	48.101	50.001	48.401	47.601	49.001	53.801	54.701	100.001
KR15078_SCStV_A	47.501	49.801	50.801	51.701	51.401	50.501	50.901	51.501	51.201	49.101	47.901	48.201	49.101	48.801	46.201	49.001	49.301	52.001	49.601	100.001
KX352044_SCStV_D	48.401	51.101	51.701	53.801	53.201	52.601	50.601	51.501	52.101	49.101	47.601	48.201	49.101	49.101	46.201	48.201	50.401	52.901	49.001	89.601	100.001
KX352043_SCStV_B	48.401	51.401	52.301	54.401	53.801	52.601	50.901	52.101	52.701	49.401	47.901	47.901	49.101	50.001	46.801	49.001	49.301	53.501	49.601	92.501	95.401	100.001
KX352045_SCStV_C	49.301	51.201	52.101	53.101	52.801	51.801	49.501	50.701	51.401	48.101	47.501	49.001	49.301	49.201	46.701	46.701	49.601	52.401	49.301	87.001	87.801	90.401	100.001
AF007881_MSV_C	48.101	46.701	47.301	48.801	47.901	47.001	47.701	47.301	45.501	47.301	47.301	47.601	47.601	47.601	47.401	48.701	50.001	51.901	44.601	52.201	51.901	51.601	51.001	100.001
AF329889_MSV_D	48.101	46.701	46.101	48.501	47.901	47.001	47.601	47.901	46.401	47.901	48.501	48.801	48.201	48.801	47.101	49.301	51.501	53.401	45.101	52.801	53.001	52.801	51.901	90.701	100.001
EU628643_MSV_K	47.301	47.601	47.601	49.401	48.801	47.901	47.901	48.201	47.301	51.501	50.001	49.701	49.401	49.101	48.001	50.101	52.901	53.101	46.601	53.301	53.001	52.801	51.901	89.601	92.701	100.001
EU628641_MSV_J	47.901	46.801	45.301	47.701	47.101	46.401	48.201	47.301	46.001	47.201	47.601	47.901	48.201	48.801	48.001	47.901	51.201	53.101	46.601	52.501	52.501	52.201	51.001	89.901	92.401	89.901	100.001
EU628597_MSV_B	47.301	48.001	47.701	49.201	48.601	47.701	48.901	47.801	47.801	50.501	49.901	49.601	49.601	49.901	50.601	47.401	51.801	53.101	46.601	51.301	51.901	51.001	52.501	83.901	86.501	86.501	87.901	100.001
EU628626_MSV_E	48.701	47.401	46.801	48.601	48.001	47.101	49.201	48.101	47.201	49.001	49.301	49.601	49.601	49.001	50.001	47.701	50.301	52.901	45.701	51.301	51.301	50.701	50.401	85.601	88.701	88.101	89.801	89.001	100.001
EU628639_MSV_I	48.101	47.301	46.701	48.801	48.201	47.301	48.501	47.901	46.901	47.901	48.501	48.801	49.401	48.801	49.501	49.001	52.601	52.501	48.101	51.601	51.301	50.701	51.001	88.701	89.901	89.601	91.501	90.401	93.801	100.001
EU628629_MSV_F	47.601	48.001	48.301	49.501	48.601	47.701	48.301	46.901	48.001	47.201	47.801	47.501	49.001	49.601	47.901	47.101	51.801	53.401	47.401	51.901	51.901	51.301	52.501	84.501	85.401	85.401	88.201	89.601	88.101	89.601	100.001
EU628638_MSV_H	47.601	47.401	47.101	50.201	48.301	48.301	48.501	47.301	47.701	50.001	48.501	48.801	49.701	49.701	49.801	48.001	52.601	54.401	46.901	53.001	53.001	52.501	53.701	83.701	85.601	85.101	87.001	91.801	87.501	89.301	94.401	100.001
EU628631_MSV_G	46.901	47.401	46.801	49.801	48.001	48.001	47.601	46.401	46.601	47.901	49.101	48.801	48.801	48.501	48.301	46.901	51.501	52.601	48.301	52.801	53.701	53.101	53.401	84.201	84.201	84.801	86.201	87.601	85.301	87.901	92.401	93.001	100.001
Y00514_MSV_A	46.401	47.701	48.001	50.201	48.601	48.501	49.101	47.901	48.701	49.401	49.101	48.801	49.401	49.401	49.501	47.401	52.101	54.701	47.101	52.801	53.701	53.101	53.101	81.701	82.301	83.101	84.201	87.001	83.901	86.201	87.601	90.701	88.701	100.001
M23022_DSV	47.801	46.701	47.601	48.901	48.501	47.401	48.001	47.301	46.301	47.901	47.701	47.701	47.401	46.801	47.401	49.401	53.101	52.201	47.201	53.201	52.101	51.801	50.601	65.701	66.301	66.001	67.101	64.901	65.701	67.401	65.101	65.401	66.801	65.701	100.001
AF072672_SSRV_A	48.601	47.001	49.401	48.501	48.801	46.701	47.101	46.901	45.701	46.601	44.901	45.801	46.901	44.801	46.701	46.201	51.601	52.301	49.301	52.701	51.001	51.301	50.901	62.601	61.201	62.301	63.701	62.001	61.901	65.201	63.201	63.201	63.401	62.901	66.401	100.001
EU244916_SSRV_B	49.101	48.501	49.401	50.001	50.001	49.801	48.901	49.001	46.301	46.601	47.201	47.201	46.901	45.401	46.701	45.701	51.301	52.001	47.601	52.001	50.301	50.901	50.601	61.801	60.601	61.501	62.901	61.801	60.801	64.001	62.301	62.601	61.701	62.001	65.401	88.901	100.001
EU244914_SSV_B	47.701	45.501	45.801	47.001	46.401	46.101	46.801	48.001	44.801	46.001	45.101	46.001	46.901	45.701	47.001	46.801	49.701	50.601	44.201	51.901	50.701	51.001	51.001	64.301	62.301	63.501	64.001	63.501	62.201	64.901	64.601	64.301	63.401	62.901	59.501	71.901	70.401	100.001
M82918_SSV_A	48.601	45.501	46.101	47.001	47.301	45.501	46.501	44.801	43.601	44.801	45.401	46.601	45.801	45.401	46.401	46.501	51.201	50.601	45.901	51.601	49.901	50.401	51.001	65.201	63.501	64.901	64.901	64.301	62.501	66.301	65.201	64.901	63.901	64.001	61.501	70.801	70.401	87.601	100.001
KX787914_SCSV	50.301	46.101	47.301	47.601	47.901	46.501	48.801	47.901	46.001	46.601	46.001	46.901	46.801	47.301	48.901	44.801	50.001	50.301	46.501	51.001	49.901	50.401	51.001	62.301	62.301	63.501	64.001	62.601	63.101	65.201	64.601	64.901	62.801	64.301	63.501	74.001	74.501	76.601	78.201	100.001
EU244915_ESV	50.001	48.501	49.701	50.301	50.001	48.201	48.301	49.801	48.601	47.501	48.601	49.801	47.501	46.801	48.801	45.001	50.901	51.901	48.201	52.001	52.601	53.101	52.001	64.301	63.501	65.201	65.401	65.401	63.901	66.001	65.701	65.701	64.801	66.001	63.501	73.301	72.901	74.701	76.001	78.001	100.001
AF239159_SSEV	49.601	49.701	48.501	50.001	50.301	49.401	47.101	47.701	45.901	47.701	47.701	47.701	47.901	46.501	46.301	47.701	53.801	53.501	48.301	53.601	53.301	53.001	51.901	66.101	65.501	67.001	68.101	67.001	66.001	68.101	67.001	67.501	68.401	66.401	68.601	73.101	75.101	69.801	69.801	76.101	75.201	100.001
EU445697_USV	50.401	48.801	49.401	49.401	50.001	49.501	48.001	48.601	47.401	47.901	48.001	48.001	49.201	45.901	47.601	46.001	48.801	49.401	45.401	53.001	51.901	51.901	51.601	67.801	67.201	67.801	69.201	69.301	70.001	70.101	68.801	69.701	68.701	67.001	65.101	68.201	68.201	69.501	70.101	73.501	71.801	75.501	100.001
GQ273988_SacSV	49.401	49.501	50.501	51.101	50.801	49.801	50.201	51.101	48.801	48.301	50.301	50.601	51.801	50.201	49.201	48.401	49.001	51.201	48.701	55.101	55.401	55.401	53.601	62.701	62.701	62.701	64.501	63.801	62.901	65.001	64.701	64.201	64.501	65.301	64.301	66.801	67.901	63.501	65.201	70.901	68.401	71.401	73.201	100.001
EU224264_PanSV_C	48.401	47.001	47.701	47.901	47.601	46.001	47.101	46.801	46.201	47.301	46.701	47.301	46.801	45.801	46.801	47.701	52.601	53.201	46.401	55.301	54.701	55.501	53.501	65.801	64.601	66.401	65.801	65.201	66.301	66.701	64.101	63.801	64.901	65.501	65.101	62.201	61.601	60.701	62.701	62.701	63.201	65.801	67.001	65.101	100.001
GQ415397_PanSV_H	47.801	47.301	48.301	48.201	48.201	46.001	48.301	47.701	47.101	48.301	46.801	46.801	48.501	47.101	47.301	50.001	52.801	52.901	46.101	55.301	55.101	55.901	53.601	66.101	64.901	67.201	65.801	65.201	66.301	66.401	64.101	63.501	64.601	65.801	64.501	62.801	61.601	62.101	63.801	63.501	64.101	64.401	67.001	65.301	95.501	100.001
L39638_PanSV_A	47.201	47.601	48.001	47.901	47.601	46.001	48.601	48.601	46.501	48.201	47.001	47.601	48.801	46.401	47.401	50.001	51.801	52.401	47.601	55.701	55.701	56.201	53.401	65.801	64.601	67.001	65.501	63.801	65.101	65.801	62.301	63.001	63.501	65.301	65.701	62.201	62.501	62.101	63.801	64.101	65.001	66.701	69.501	67.901	93.801	94.101	100.001
GQ415389_PanSV_E	48.101	47.301	47.001	47.601	47.301	46.301	48.001	47.401	45.601	47.301	46.701	47.301	47.101	46.701	47.101	48.001	53.801	53.201	46.701	55.001	55.501	54.901	53.501	66.701	64.901	67.201	65.801	65.801	66.001	66.701	63.501	63.501	64.101	65.201	65.701	62.201	61.601	61.801	64.401	64.701	65.001	67.001	68.401	66.201	94.901	92.901	90.701	100.001
GQ415401_PanSV_I	48.101	47.001	47.301	47.601	47.301	46.301	47.401	46.801	45.001	48.301	47.701	47.701	48.001	45.601	47.601	48.301	53.101	52.101	47.601	53.001	53.601	53.901	51.301	65.201	64.101	67.201	64.901	64.101	64.501	65.501	61.701	61.401	63.201	64.601	65.401	62.501	62.201	61.501	62.401	64.101	63.801	66.401	67.001	65.301	87.501	87.801	88.101	87.501	100.001
EU224265_PanSV_D	48.401	47.901	49.101	49.701	49.401	48.201	48.901	48.901	47.101	46.801	48.001	48.001	49.401	47.101	47.601	49.401	54.401	53.801	49.101	54.001	55.501	55.201	54.101	65.501	64.601	66.101	64.301	64.101	64.001	64.901	62.301	63.001	63.801	65.901	65.101	63.901	63.901	63.501	64.401	64.701	66.101	67.801	70.701	67.301	86.401	86.901	87.801	86.601	84.701
GQ415396_PanSV_G	49.001	47.301	48.801	49.101	48.801	47.601	48.001	48.001	45.001	45.901	45.901	46.501	48.201	45.601	46.601	46.701	53.501	52.401	49.001	52.701	53.901	53.001	51.601	64.301	62.901	65.201	62.901	62.901	63.101	63.801	60.601	61.201	61.701	62.601	65.401	62.201	62.501	62.101	64.401	64.101	65.501	67.201	68.901	65.601	85.601	85.601	86.401	88.001	83.001
X60168_PanSV_B	47.001	45.801	46.101	46.401	45.801	45.501	46.201	46.301	44.801	45.701	46.001	46.301	47.301	45.101	45.201	49.401	53.101	51.801	46.001	50.901	52.301	51.701	50.901	62.401	61.501	63.201	61.801	60.101	61.401	61.501	59.501	59.501	61.701	61.501	62.801	60.001	60.801	60.801	61.901	63.301	62.201	67.801	70.101	64.501	83.501	84.901	85.201	84.701	83.001
JQ624879_MSRV	48.801	47.101	46.501	47.401	47.701	47.901	48.601	47.401	46.201	46.801	47.701	47.701	48.301	46.501	45.501	44.901	48.701	52.201	48.701	54.801	54.301	54.601	52.801	54.401	53.801	55.301	55.301	54.701	53.901	57.001	53.601	53.901	55.701	55.301	53.201	53.201	54.901	52.201	53.601	53.701	55.501	53.401	54.001	52.601	52.001	53.001	52.601	53.401	53.601
JQ361910_WDIV	49.301	50.601	51.201	52.101	51.801	50.901	52.001	51.401	48.701	50.201	53.501	53.801	53.801	52.001	50.001	49.001	51.301	54.701	48.401	53.401	53.801	53.001	52.401	56.101	56.101	56.601	54.901	56.601	55.801	56.901	55.501	55.801	56.601	56.601	54.501	52.701	53.001	53.001	52.101	54.901	56.401	55.201	54.301	52.301	50.301	51.901	51.401	51.701	50.001
KJ187745_SWSV_A	46.301	47.001	47.301	47.301	47.901	47.601	47.201	47.201	47.201	47.501	49.001	49.301	47.001	47.501	47.301	45.501	49.301	52.601	48.001	52.001	50.801	50.801	50.101	51.301	52.101	53.301	51.601	53.001	52.301	53.001	52.301	51.601	52.001	53.701	50.001	49.201	49.201	47.101	46.501	48.901	48.901	50.001	51.601	47.701	50.301	48.901	49.101	49.401	47.401
KJ187747_SWSV_B	46.601	47.601	48.201	47.901	48.501	48.201	47.501	47.501	47.801	47.801	49.301	49.301	47.801	48.101	48.201	46.301	49.901	53.801	47.801	51.101	51.101	51.101	50.401	51.601	52.401	53.501	51.901	53.001	52.301	53.001	52.301	51.601	52.101	53.701	49.401	49.701	49.401	47.001	46.101	49.201	48.901	50.901	52.801	48.601	50.301	49.101	49.701	49.201	48.901
KJ187749_SWSV_C	48.901	48.501	49.101	48.801	49.401	49.101	47.801	47.501	47.801	48.101	49.601	50.101	49.401	49.601	49.401	45.801	50.101	54.401	49.301	51.301	51.301	51.301	50.701	52.201	53.301	53.601	51.901	53.001	52.001	53.901	53.201	52.001	52.401	53.701	52.201	50.801	51.301	47.001	47.901	50.401	50.101	51.701	53.001	49.101	49.701	48.901	49.701	48.001	48.301
AJ783960_WDV_A	46.601	47.901	49.701	49.401	49.701	49.401	49.501	49.201	50.801	52.001	52.401	52.601	50.001	50.501	50.001	48.801	49.501	51.801	44.701	46.401	45.801	46.401	46.701	43.101	41.901	44.301	43.401	43.501	44.901	45.201	44.901	44.901	45.801	46.401	46.701	45.301	46.801	46.601	45.501	47.901	48.701	47.701	45.001	45.901	46.801	47.701	47.101	46.501	45.901
FJ620684_WDV_B	47.301	48.001	49.801	48.901	48.301	48.901	49.401	49.101	50.301	50.901	51.401	51.501	49.001	50.001	48.901	50.001	52.101	52.301	45.701	45.301	45.301	46.501	46.201	42.601	41.501	43.901	42.601	43.001	44.501	44.801	44.501	44.801	44.801	46.601	46.301	45.501	47.001	45.401	46.301	47.801	49.701	47.001	44.501	46.001	47.601	48.201	47.901	47.301	46.601
AM040732_WDV_E	47.501	46.401	48.201	47.901	48.201	47.901	49.201	48.901	51.101	51.401	51.801	52.001	48.801	50.801	50.301	47.901	49.201	52.101	45.301	45.901	45.601	46.201	44.301	43.701	42.801	44.301	44.001	43.501	43.801	44.201	44.901	44.901	45.601	46.701	47.601	45.301	46.501	45.001	44.701	46.201	45.801	48.901	45.001	46.201	47.401	48.001	46.501	47.401	47.101
JQ647455_WDV_C	47.501	46.101	47.901	47.601	47.901	47.601	48.901	48.301	50.801	51.401	51.801	52.001	48.801	50.801	50.301	48.201	49.201	52.401	45.601	45.901	45.601	46.201	44.301	43.701	43.101	44.601	44.201	42.901	43.501	44.001	44.301	44.301	45.001	46.101	47.001	45.601	46.201	45.301	45.001	46.501	45.801	49.201	45.901	46.201	47.701	48.301	46.801	48.001	47.101
JN791096_WDV_D	47.201	47.001	48.801	48.501	48.801	48.201	49.201	48.901	51.101	51.701	52.101	52.301	48.501	51.101	49.701	47.901	48.901	52.101	45.001	45.601	45.301	45.901	45.601	43.701	42.801	44.301	44.001	43.501	44.001	45.201	44.901	44.901	45.601	46.701	47.901	45.301	46.501	45.301	45.301	46.801	46.201	48.601	44.701	46.501	48.001	48.601	47.101	48.001	47.401
AM296025_ODV	44.401	47.701	48.001	47.401	49.801	47.601	48.501	47.901	47.601	50.901	50.001	50.601	48.101	49.701	51.701	47.701	47.901	49.101	45.701	44.901	43.901	45.501	44.301	45.101	44.701	46.701	46.201	46.001	45.701	45.001	45.101	46.301	45.101	46.301	47.001	46.501	45.401	46.601	47.501	46.901	45.301	47.901	48.501	45.401	45.101	46.301	46.301	46.601	47.301
E02258_MiSV	48.101	48.901	48.301	49.101	48.301	48.601	49.101	49.501	47.601	50.201	46.801	47.301	48.501	48.301	47.301	47.101	46.801	47.301	48.201	45.901	45.001	44.701	45.601	44.301	44.901	46.401	44.001	46.101	45.501	45.201	45.501	47.301	46.401	45.801	45.501	46.301	44.701	45.201	43.201	48.801	47.501	47.501	44.201	44.701	44.401	45.301	45.001	44.801	44.401
JF508490_EMSV	49.701	50.801	51.401	51.401	50.801	51.501	50.301	49.701	48.801	49.101	47.901	48.201	50.001	49.901	48.601	49.901	50.301	50.401	49.901	46.101	46.401	45.201	47.101	47.501	47.501	47.201	47.501	49.001	47.201	48.501	48.101	50.101	49.001	48.701	49.401	49.401	50.301	47.801	48.401	49.001	49.601	50.901	49.401	48.501	48.101	48.401	47.501	48.201	48.401
HM122238_DDSMV	48.001	48.001	48.301	48.901	48.001	46.501	47.301	47.601	47.601	47.001	48.801	48.501	47.801	47.901	49.501	44.501	48.401	50.601	44.301	45.501	46.201	46.001	43.601	45.201	46.301	45.701	45.501	45.501	45.501	46.001	44.901	46.301	45.801	46.001	45.301	45.401	47.701	43.801	45.101	44.801	44.801	46.601	43.301	43.501	46.101	46.701	47.201	45.301	44.301
M20021_CSMV	44.901	45.001	45.601	46.501	46.801	44.701	48.601	47.901	48.501	47.901	48.201	48.501	48.501	48.801	48.901	45.601	47.501	49.901	44.501	46.501	46.801	46.201	45.101	46.001	46.301	45.701	46.901	44.801	45.701	45.401	45.401	45.101	45.401	45.101	44.901	46.001	46.901	45.301	45.901	45.901	45.901	45.601	41.201	42.701	43.601	44.201	44.201	45.101	43.001
HQ113104_BCSMV	47.301	48.501	49.701	48.301	47.901	48.801	47.701	48.001	47.101	50.201	47.701	48.301	48.601	46.801	47.501	45.501	50.301	50.101	45.801	47.401	46.801	47.101	46.301	45.301	45.901	46.701	45.601	46.401	46.701	47.301	46.201	47.601	47.301	47.001	48.801	48.101	48.101	44.601	46.601	47.501	46.601	47.201	46.901	47.201	49.301	49.901	50.101	47.301	47.201
JQ948087_PDSMV	47.201	47.301	48.501	48.901	49.101	48.901	46.401	46.401	46.801	47.401	44.901	46.401	46.201	47.701	46.401	44.501	50.001	46.801	43.301	46.001	45.201	45.501	46.301	45.901	45.601	46.201	45.901	45.601	45.601	45.601	46.401	46.501	46.201	46.701	48.501	46.901	47.501	44.301	46.501	45.801	45.501	46.801	45.101	46.501	46.201	46.801	46.801	45.701	45.101
JF905486_PSMV_A	49.401	43.201	46.301	45.601	45.001	45.901	45.401	44.801	46.701	48.201	46.701	47.001	46.101	45.801	46.501	45.201	50.101	49.901	44.901	46.501	46.301	46.201	45.601	44.501	46.001	45.401	45.101	46.001	44.001	44.201	46.301	46.901	47.201	45.101	47.001	45.901	45.601	47.101	46.801	46.801	45.301	47.401	45.101	45.701	46.201	46.001	47.401	44.901	44.201
JQ948069_PSMV_B	48.501	43.501	46.401	45.001	44.401	45.901	45.601	45.001	45.501	46.701	46.401	46.701	46.701	45.801	46.801	45.601	48.701	49.101	44.701	46.301	47.101	46.601	45.801	45.501	46.101	46.901	45.501	45.501	45.701	45.201	45.801	46.601	46.901	45.501	48.401	45.801	45.101	46.801	46.801	49.101	46.901	49.701	46.201	46.501	45.101	44.801	46.501	44.601	43.601
JQ948088_DCSMV_B	45.301	47.701	48.901	48.601	48.501	48.501	48.001	48.401	49.301	49.301	47.801	49.301	47.301	48.101	49.101	47.101	49.901	49.301	46.201	46.001	44.901	45.701	46.001	44.301	44.301	44.301	44.301	44.301	45.901	45.201	45.701	44.901	45.201	45.401	48.401	46.801	47.201	44.501	49.601	47.401	47.201	47.601	47.101	48.001	47.801	47.701	48.401	47.001	46.101
JQ948091_DCSMV_A	45.301	47.701	48.901	48.601	48.501	48.501	48.301	48.401	49.301	48.701	47.201	48.701	47.301	47.501	48.501	46.501	49.301	48.701	46.201	46.001	44.901	45.701	46.001	44.301	44.301	44.301	44.301	44.301	45.901	45.201	45.701	44.901	45.201	45.401	48.401	46.801	47.201	44.501	49.001	46.801	47.201	47.601	47.101	48.001	47.201	47.101	47.801	46.401	45.501
FJ665632_ECSV	38.201	35.301	35.801	34.801	34.801	35.401	35.001	35.401	35.601	32.801	34.401	35.001	32.101	34.001	33.001	32.801	33.001	35.101	30.701	34.501	33.301	33.301	33.601	32.401	32.601	32.301	32.601	32.201	32.401	33.601	32.601	32.001	32.401	30.601	33.401	31.601	32.501	30.301	32.801	32.001	31.601	31.401	32.801	32.501	33.301	33.601	33.001	33.301	33.001
[truncated: 25 more columns]
